# Supplementary material
Source: MDPI journal article supplement (https://www.mdpi.com/2072-4292/7/12/15843)
Supplement: s1 [file s1]

*Supplementary* *Information*

Development and Evaluation of a Multi-Year Fractional Surface Water Data Set Derived from Active/Passive Microwave Remote Sensing Data


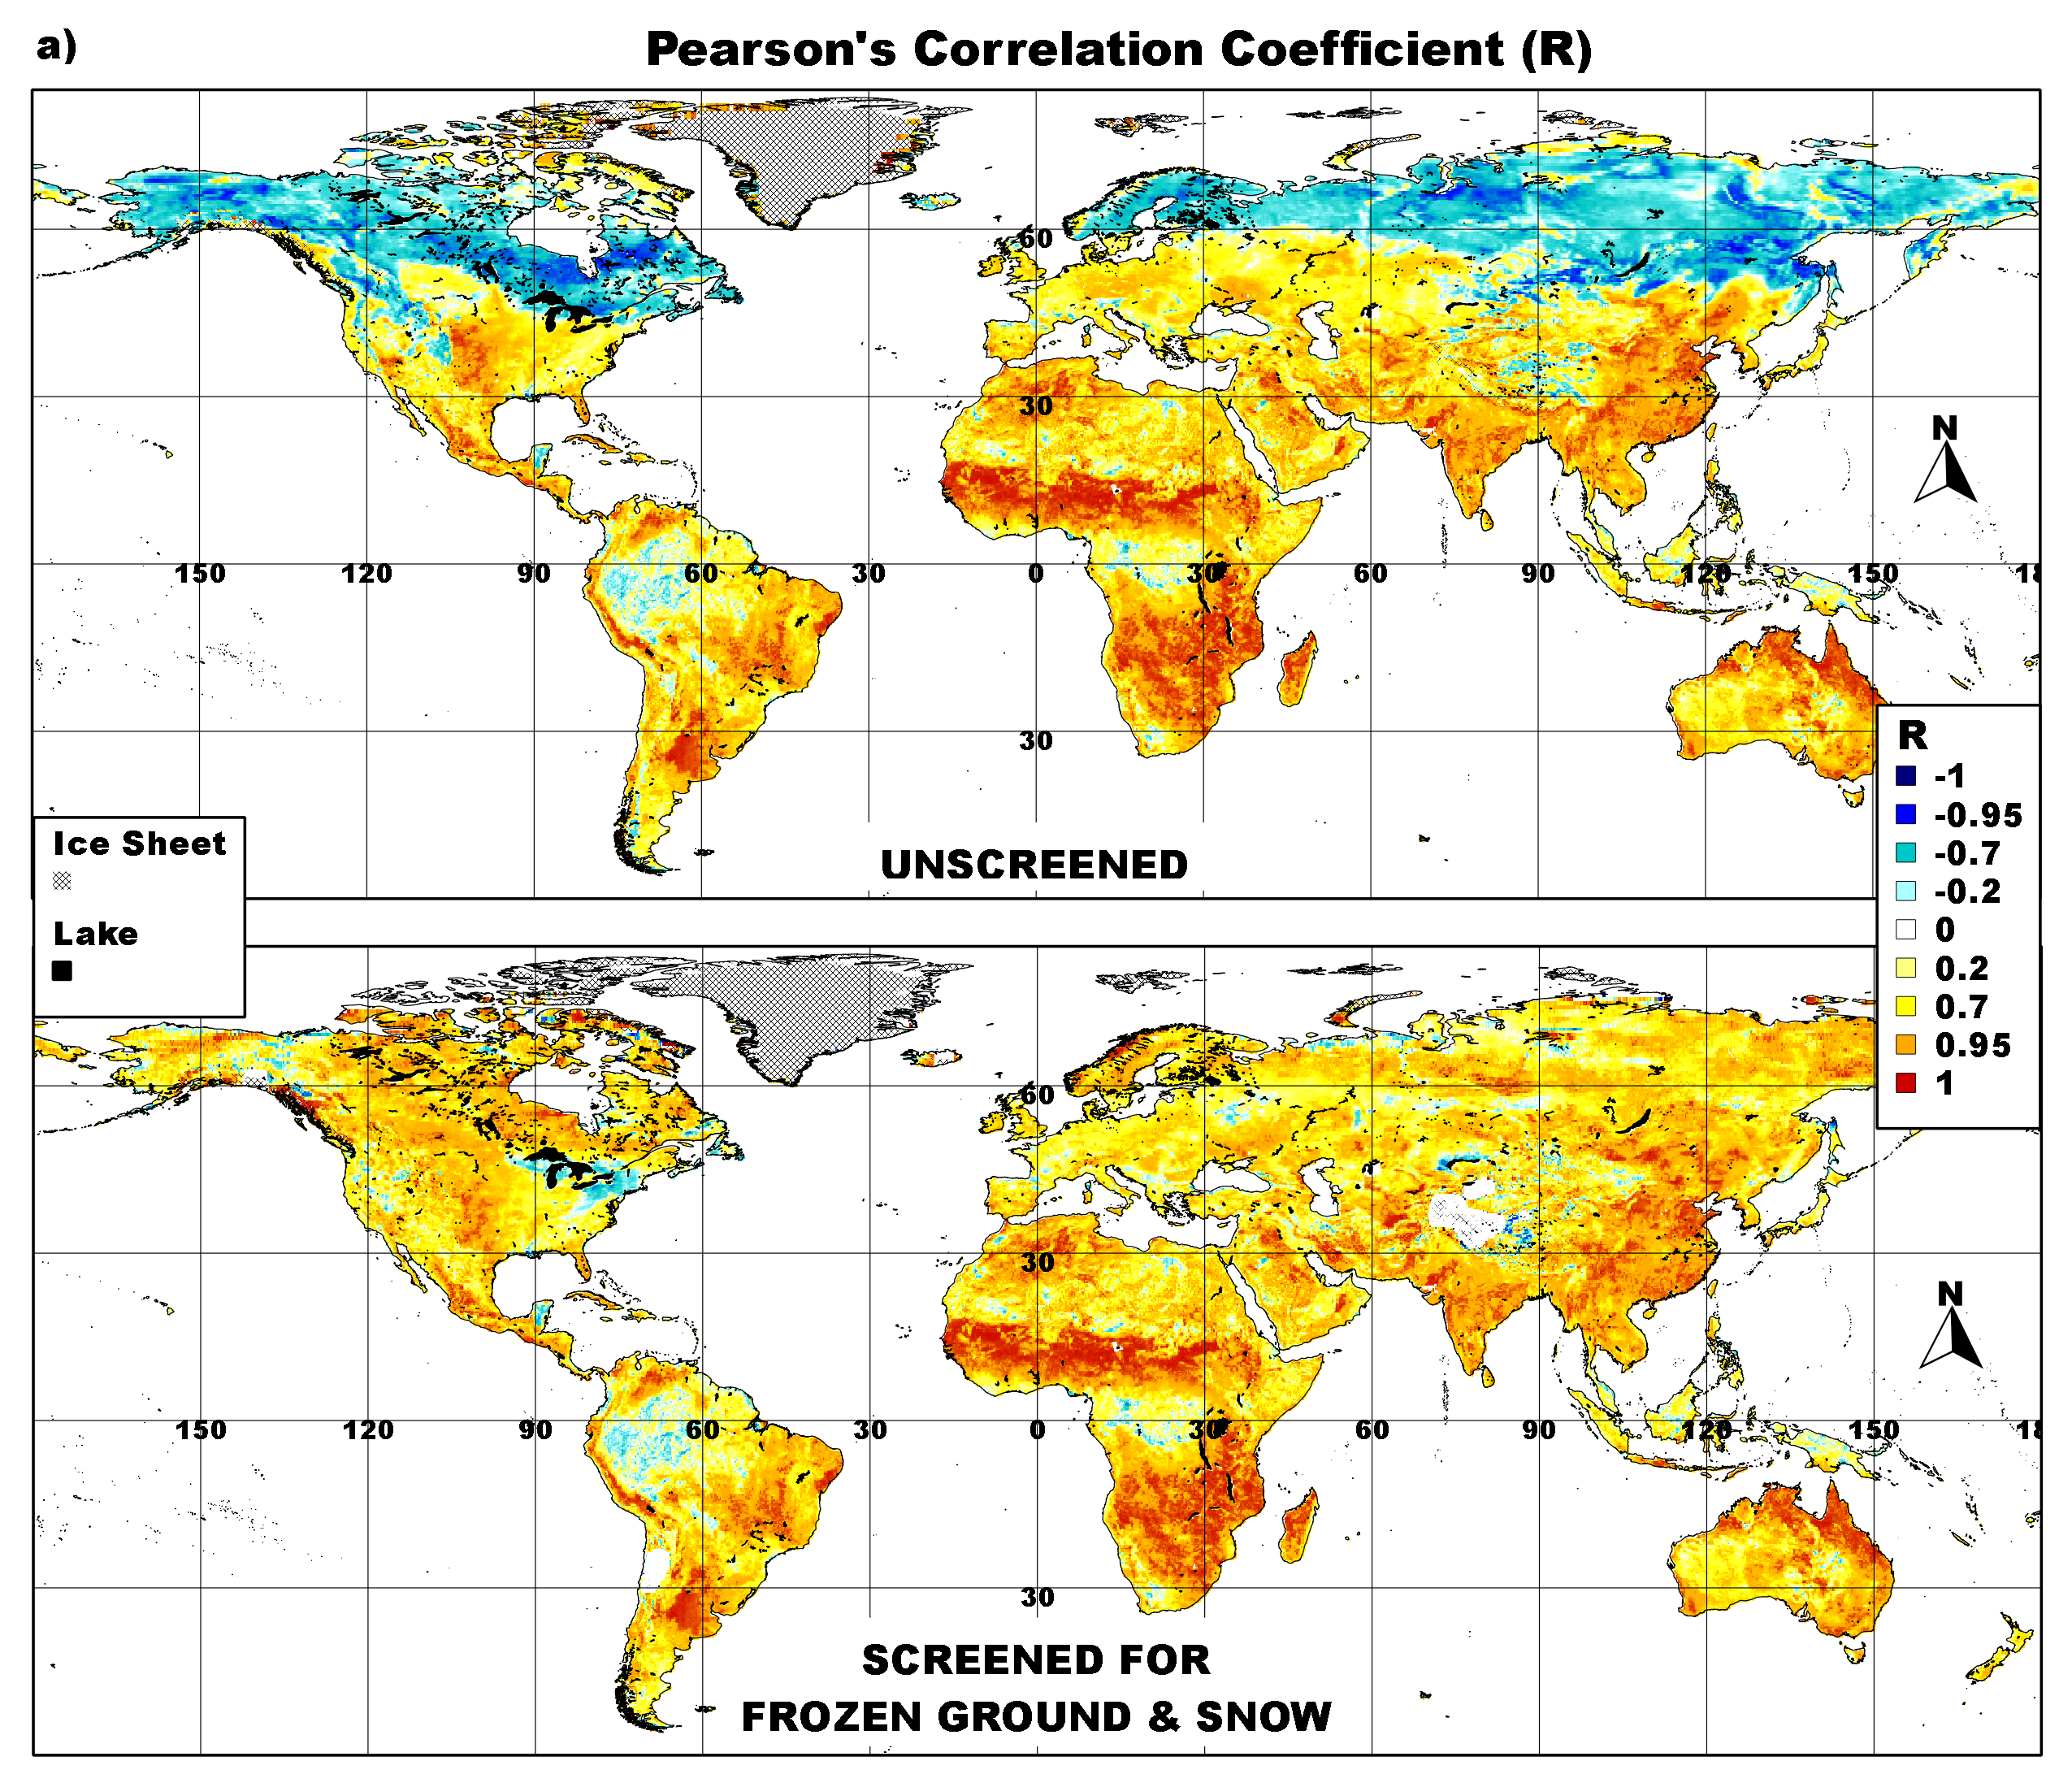


**Figure S1.** *Cont.*


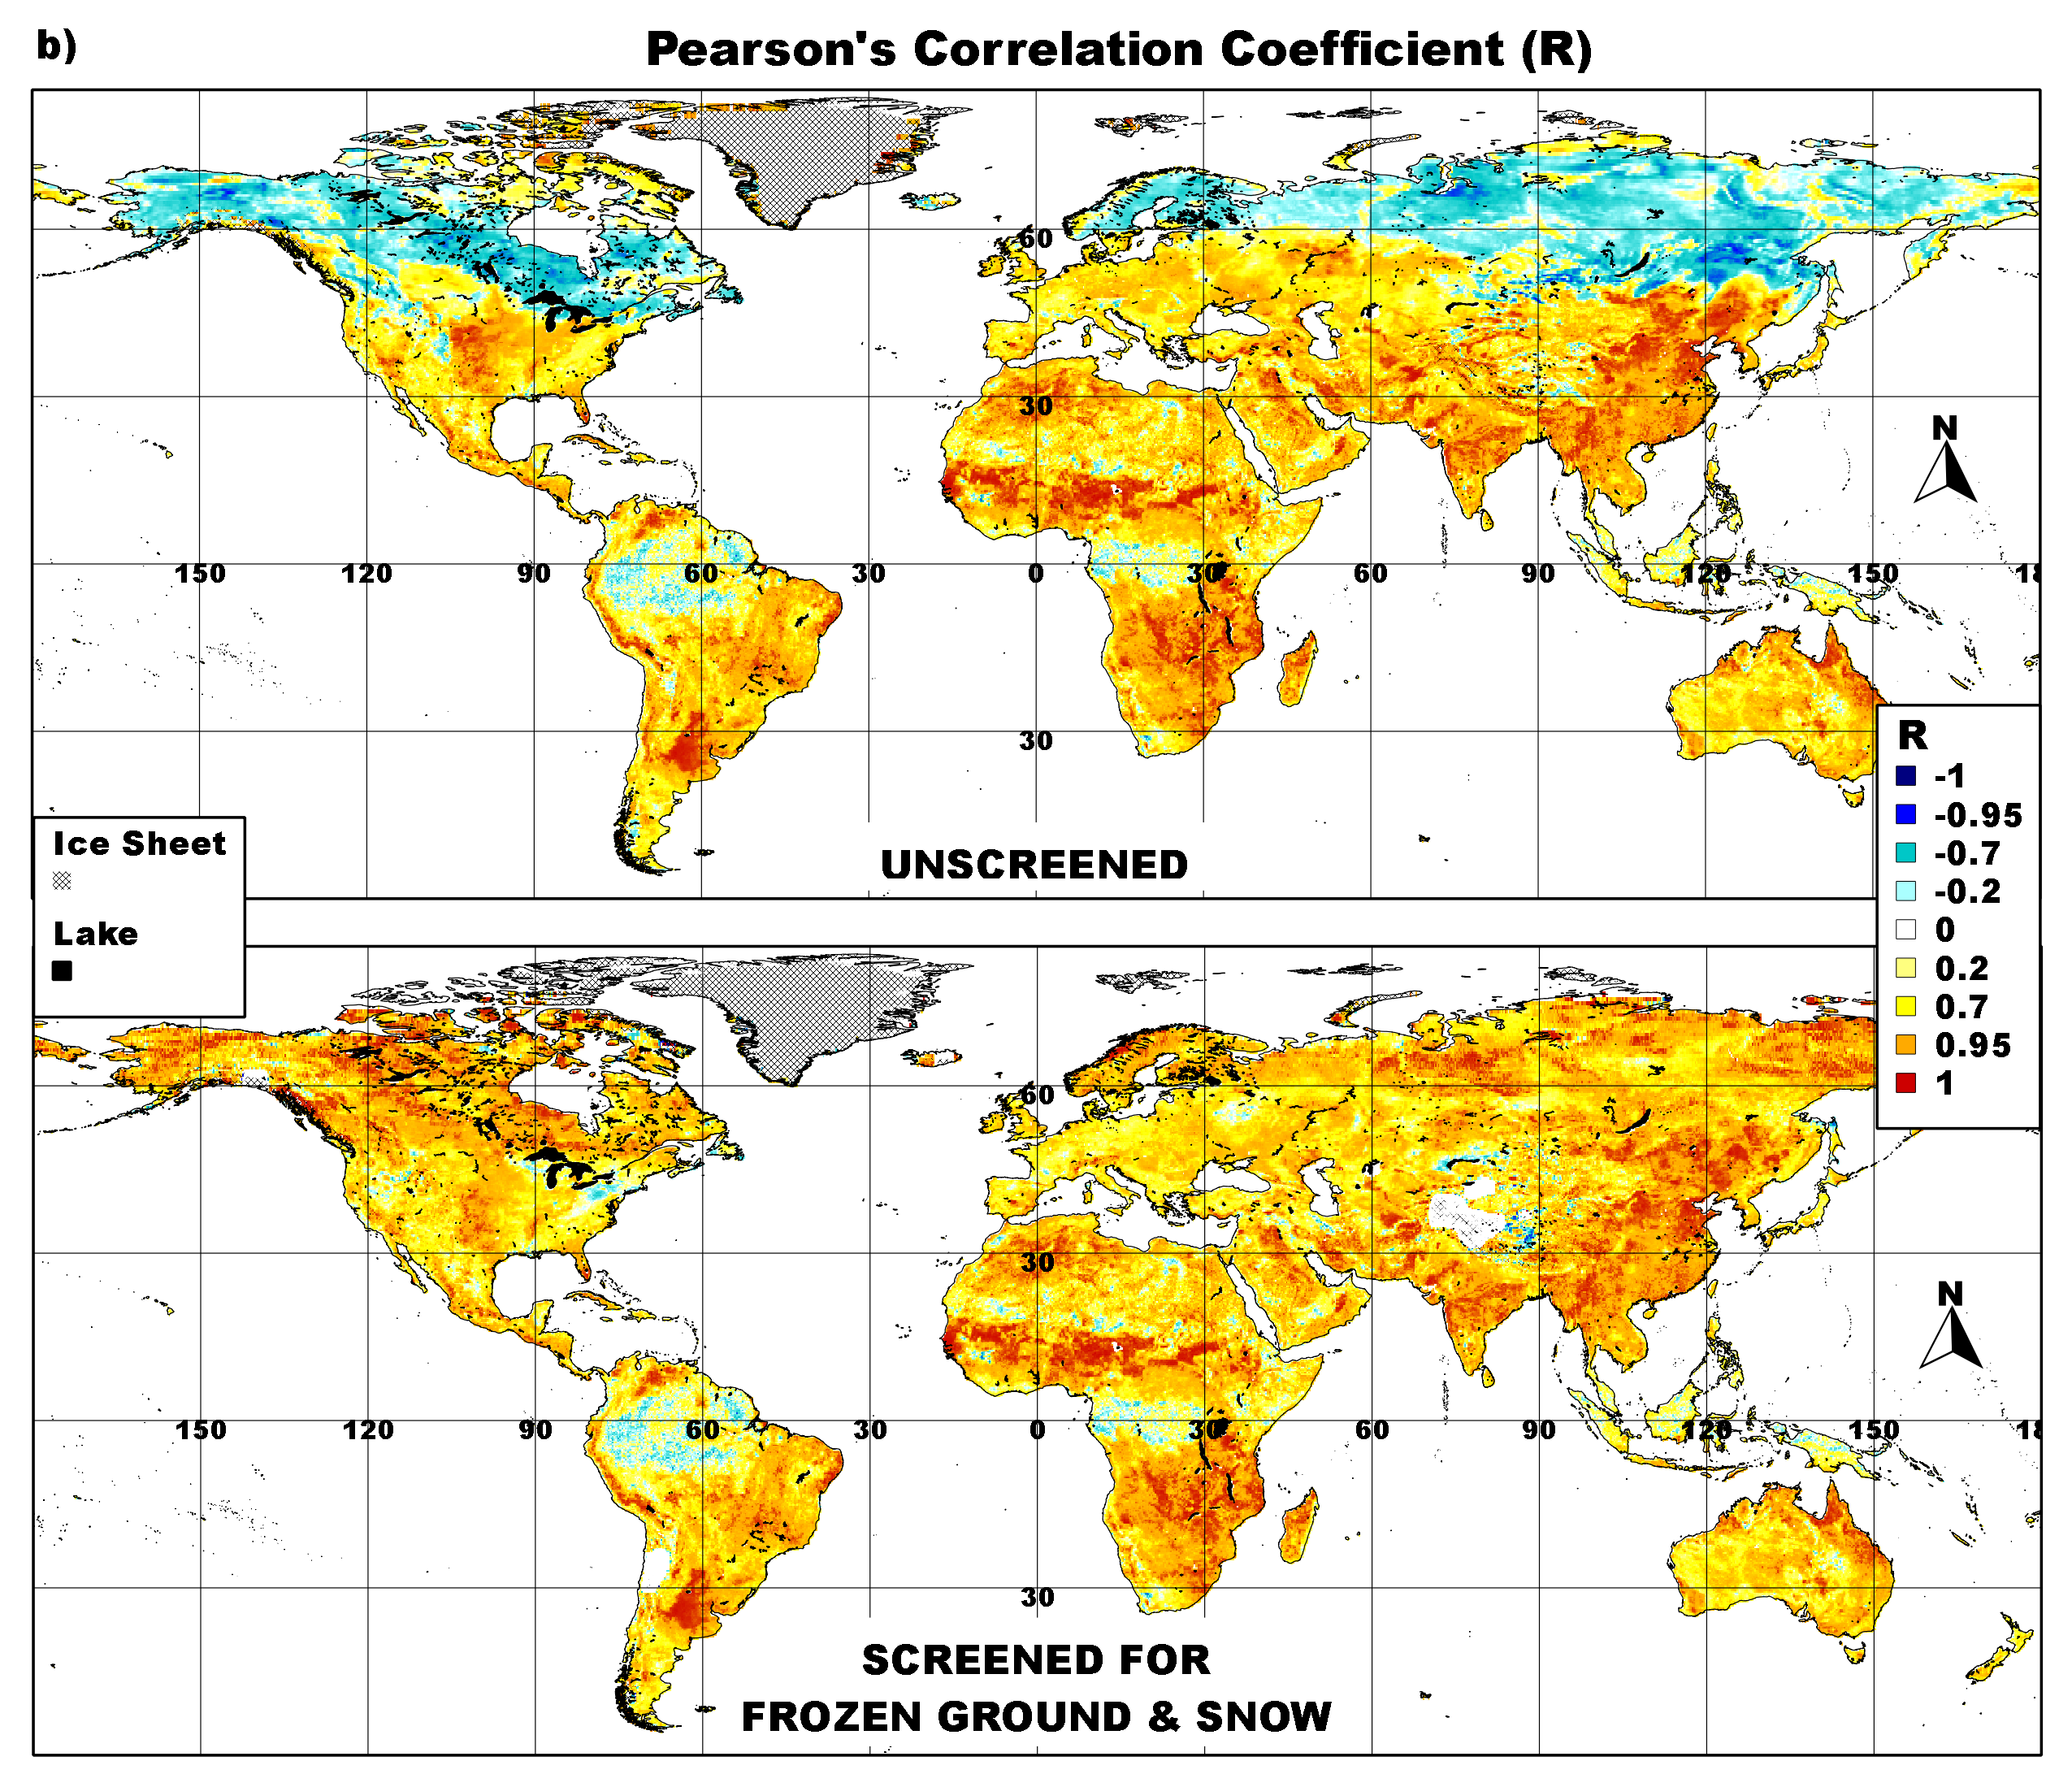


**Figure S1.** (**a**) Morning (A.M.) and (**b**) evening (P.M.) pixel-wise Pearson’s correlation coefficient (R) between overlapping time-averaged daily C-band ASCAT and Ku-band QSCAT σ0 time series (November 2008–November 2009) for unscreened (top) and frozen ground and snow screened (bottom) time periods. Actual figure color is a linear interpolation of the colors in the legend. All maps in geographic projection. Distance covered by one degree of latitude is approximately 111-km.


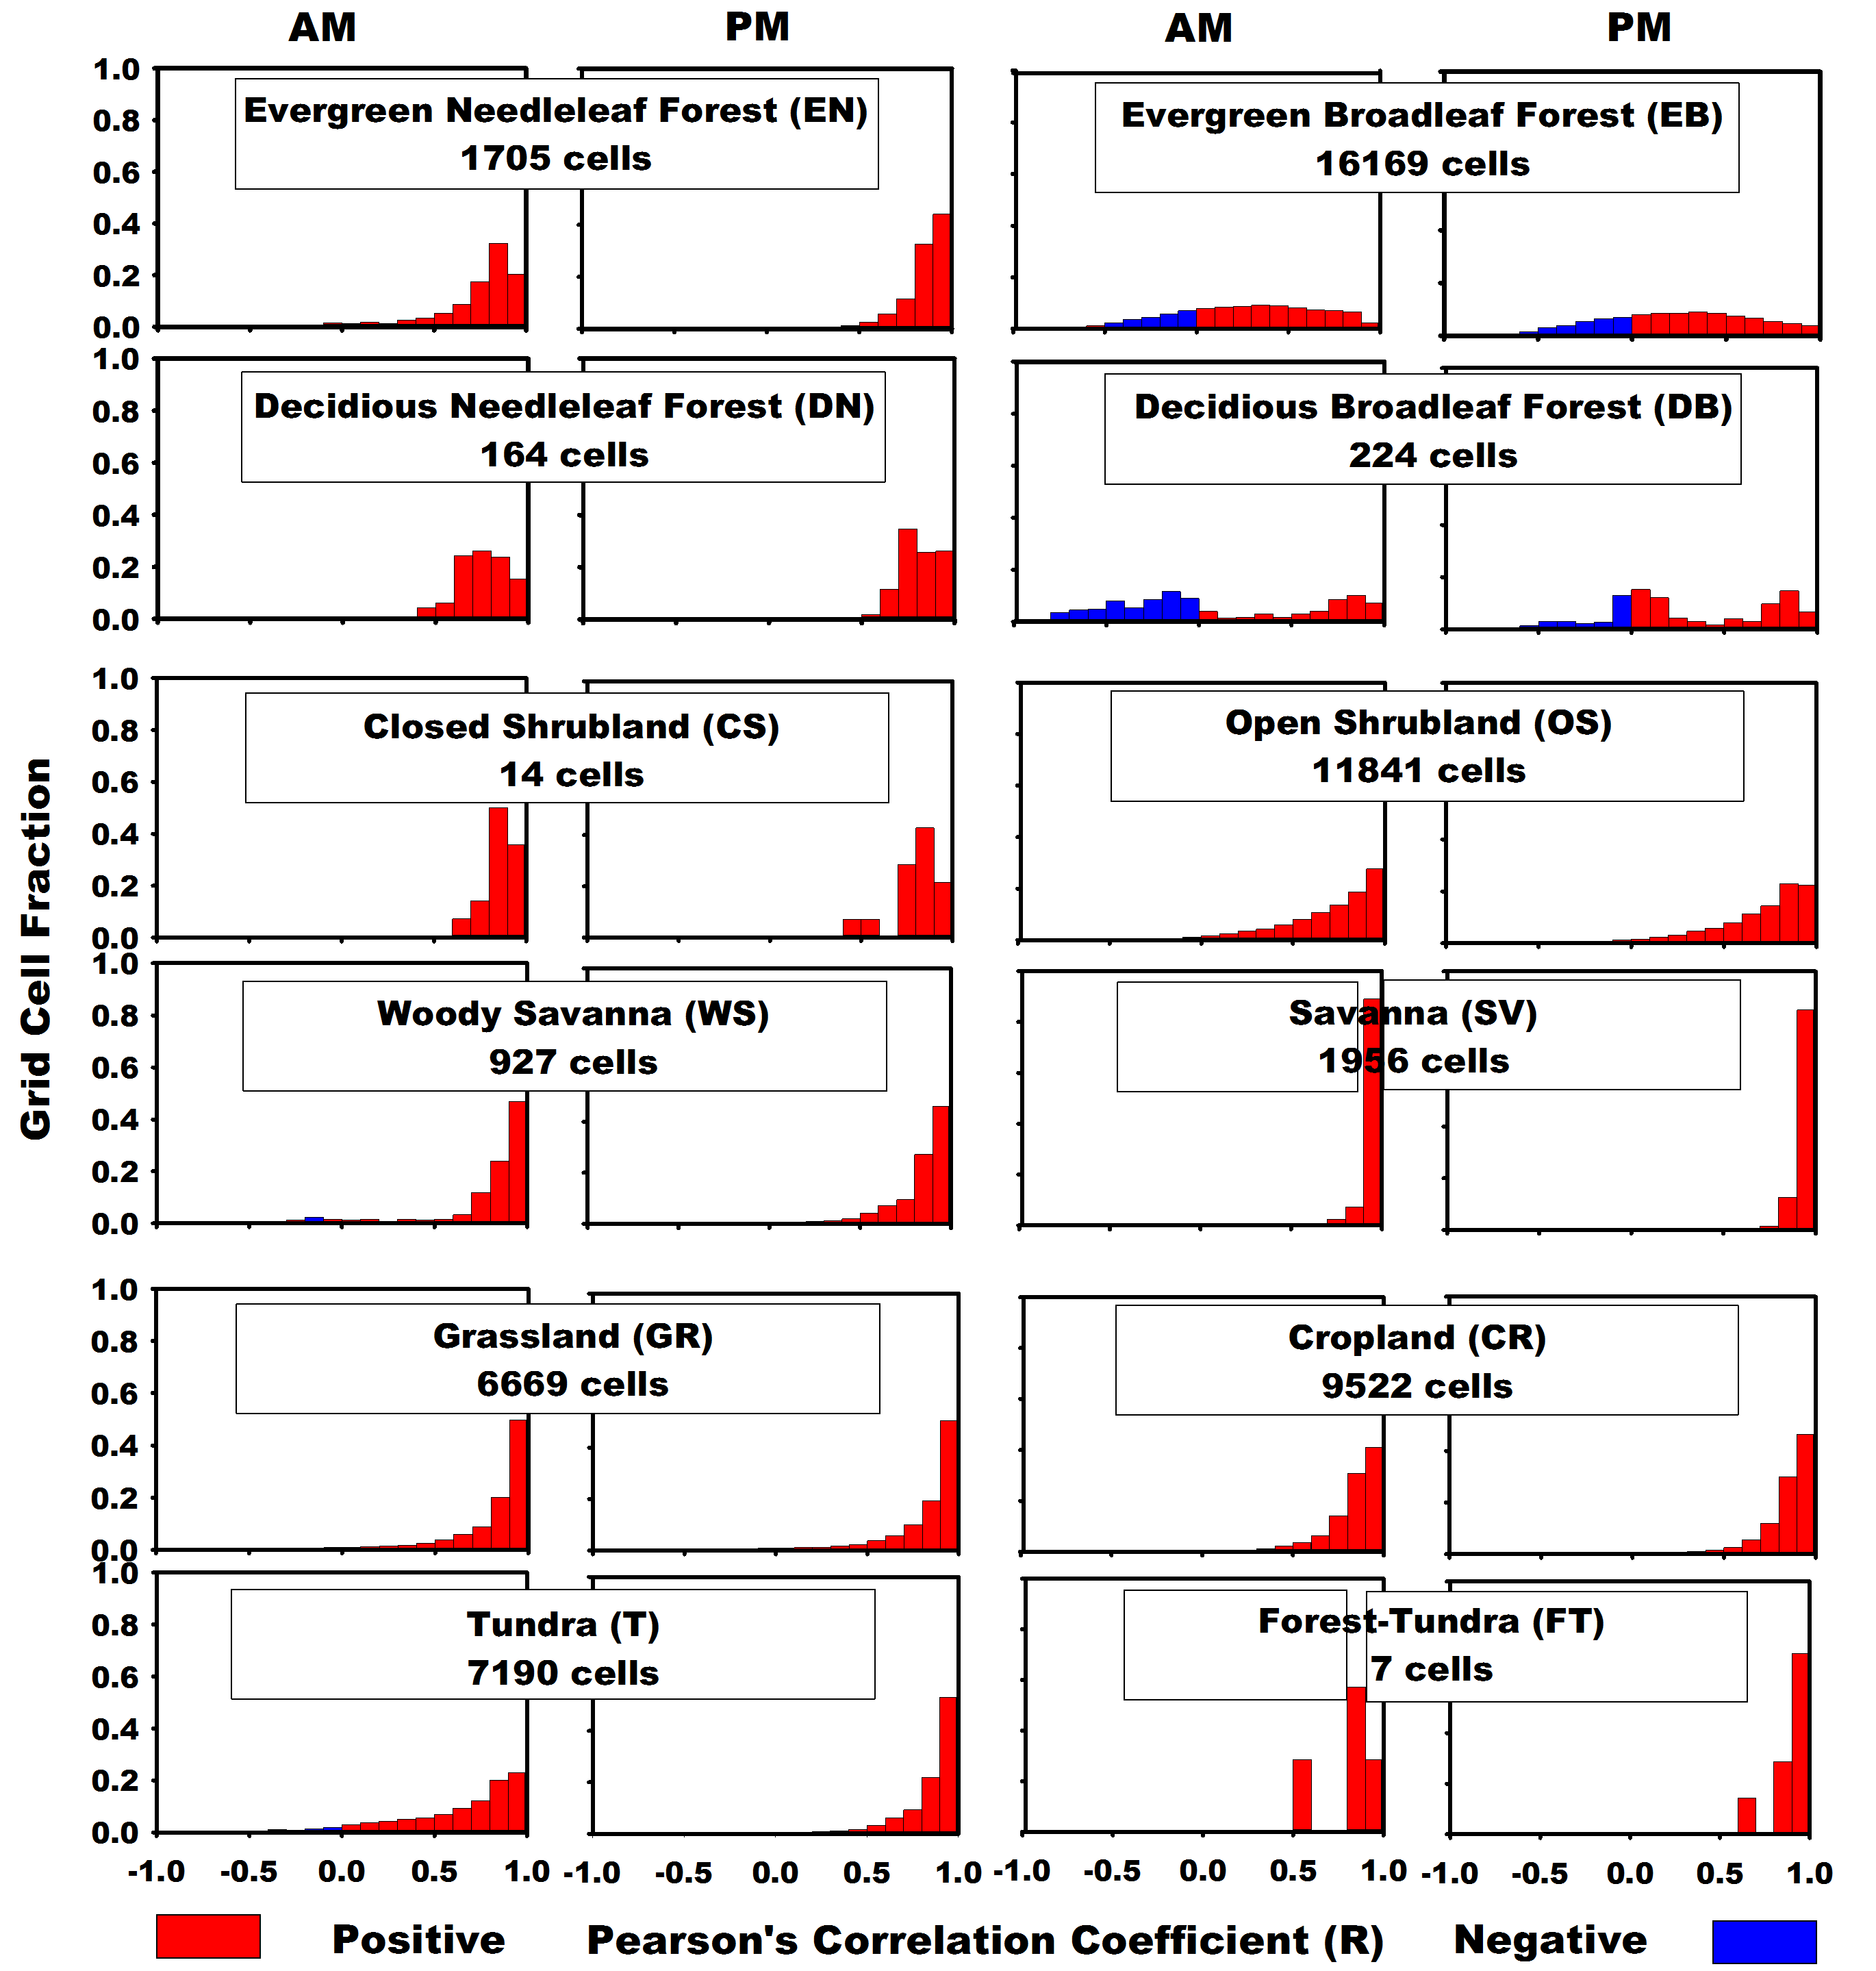


**Figure S2.** Histograms of morning (A.M.) and evening (P.M.) Pearson’s correlation coefficients (R) over dominant land cover types between overlapping, snow screened and time-averaged daily C-band ASCAT and Ku-band QSCAT σ0 time series (November
2008–November 2009).


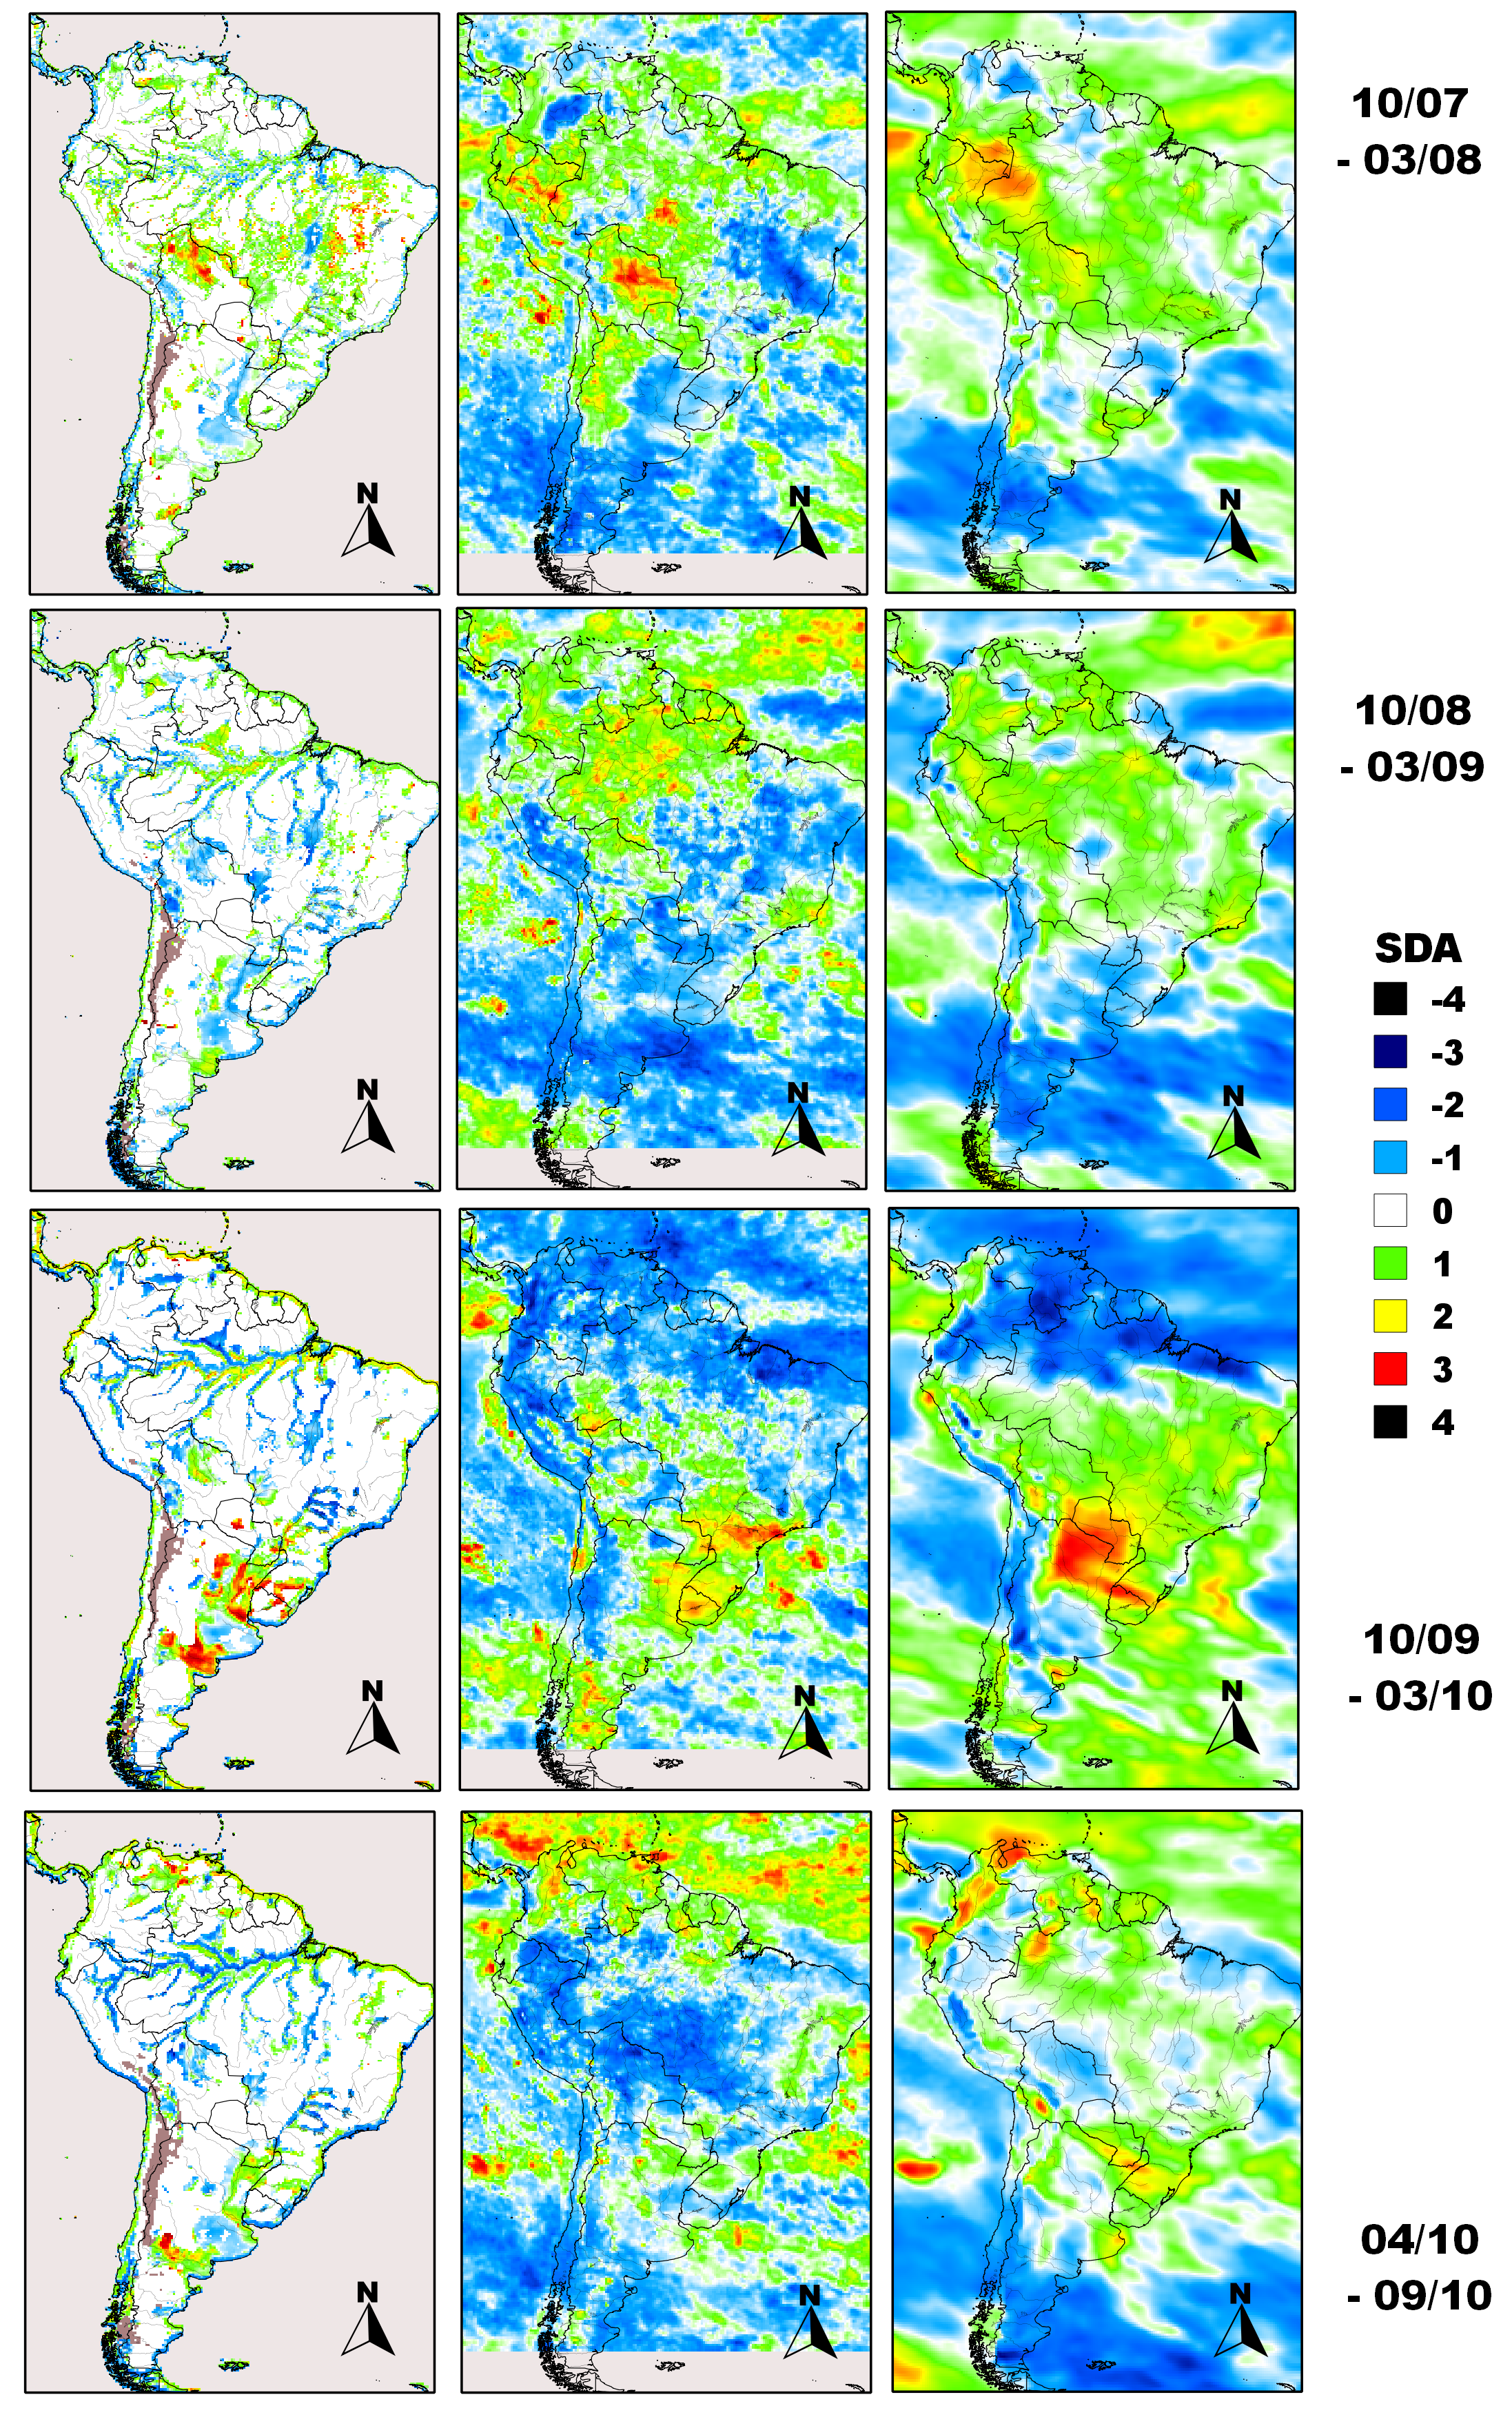


**Figure S3.** Monthly mean standardized anomalies (SDA) of fractional water (FW) over South America (55°S–15°N, 35°W–85°W) for four time periods as determined from combined v1-QSCAT (2000–2008) and v2-ASCAT (2009–2012) monthly means during an unusually fast phase transition of the 2009–2010 warm pool El Niño event (**left**) and corresponding monthly mean precipitation SDA from the MERRA (2000–2012) reanalysis (**middle**) and satellite TRMM (2000–2012) (**right**). Areas in light grey are outside of the domain, while areas in dark grey represent snow-covered regions. Satellite TRMM precipitation is limited to between 50°S and 50°N. Actual figure color is a linear interpolation of the colors in the legend. Map projection same as Figure S1. Distance covered by one degree of latitude is approximately 111-km.
